# Supplementary material
Source: publisher site journal article supplement (https://www.dovepress.com/article/supplementary_file/547898/547898_Supplementary%20tables%20BT%20%25281%2529.docx)
Supplement: Supplementary file 1 [file 547898_Supplementary%20tables%20BT%20%25281%2529.docx]

**Supplementary Table 1**

Univariate logistic regression analysis of factors associated with postoperative blood transfusion in patients undergoing hip fracture repair.

| **Variable** | **Odds Ratio** | **p-value** | **[95% Conf. Interval]** |
| --- | --- | --- | --- |
| Age | 1.012291 | 0.246 | 0.9915995-1.033415 |
| Gender | 0.8788446 | 0.42 | 0.6420896-1.202897 |
| Clopidogrel | 1.797141 | 0.044 | 1.014836-3.1825 |
| Preoperative Hb | 0.5196204 | 0.000 | 0.4682344-0.5766456 |
| Preoperative ICU admission | 0.5447922 | 0.258 | 0.190002-1.562081 |
| Cefuroxime or Cefazolin | 0.9606094 | 0.889 | 0.5462107-1.689404 |
| Cefuroxime and Vancomycin | 1.600941 | 0.181 | 0.8036294-3.189298 |
| Other antibiotics | 2.682269 | 0.452 | 0.2054143-35.02466 |
| Spinal Anesthesia | 1.347735 | 0.07 | 0.9761159-1.860833 |
| General | 1 |  |  |
| Stable femoral neck | 0.3944236 | 0.038 | 0.163567-0.9511085 |
| Stable intertrochanteric | 0.8800227 | 0.582 | 0.558287-1.387172 |
| Unstable intertrochanteric | 1.124575 | 0.527 | 0.7816599-1.617926 |
| Postoperative ICU admission | 2.167664 | 0.004 | 1.284769-3.657286 |
| Postoperative NSAIDS | 0.2220736 | 0.185 | 0.0240528-2.050348 |
| Postoperative opioids | 1.387962 | 0.053 | 0.9956066-1.934939 |
| Length of hospital stay | 1.053108 | 0.005 | 1.016077-1.091489 |
| Readmission in 1 month | 1.549045 | 0.08 | 0.9486193-2.529509 |

*Note.* OR = odds ratio; ICU = intensive care unit; NSAIDs = nonsteroidal anti-inflammatory drugs. Variables were analyzed using univariate logistic regression.

**Supplementary Table 2**

Multivariable logistic regression model identifying independent risk factors for deep vein thrombosis (DVT) or pulmonary embolism (PE) following hip fracture repair.

| **Variable** | **Odds ratio** | **p-value** | **[95% conf. Interval]** |
| --- | --- | --- | --- |
| Postoperative blood transfusion | 0.5978758 | 0.292 | 0.2295875-1.556947 |
| Clopidogrel | 1.384873 | 0.618 | 0.3854307-4.975921 |
| Preoperative Hb | 0.8535252 | 0.208 | 0.6669187-1.092345 |
| Spinal vs general anesthesia | 1.089021 | 0.841 | 0.4721335-2.511931 |
| Stable femoral neck fracture | 1 |  |  |
| Postoperative ICU admission | 2.238533 | 0.145 | 0.7576271-6.614114 |
| Length of hospital stay | 1.023788 | 0.462 | .9616036-1.089993 |

*Note.* OR = odds ratio; ICU = intensive care unit; Hb = hemoglobin; DVT = deep vein thrombosis; PE = pulmonary embolism. Variables were analyzed using a multivariable logistic regression model.

**Supplementary Table 3**

Multivariable logistic regression model assessing predictors of hospital readmission within one month after hip fracture repair.

| **Variable** | **Odds Ratio** | **p-value** | **[95% Conf. Interval]** |
| --- | --- | --- | --- |
| Postoperative blood transfusion | 1.449845 | 0.118 | 0.910385-2.308969 |
| Clopidogrel | 1.063033 | 0.867 | 0.5203381-2.171739 |
| Preoperative Hb | 0.9857042 | 0.812 | 0.8752076-1.110151 |
| Spinal vs general anesthesia | 1.017097 | 0.936 | 0.6715244-1.540505 |
| Stable femoral neck fracture | 0.7881709 | 0.658 | 0.275068-2.258399 |
| Postoperative ICU admission | 0.9338247 | 0.84 | 0.4796216-1.818159 |
| Length of hospital stay | 1.034696 | 0.063 | .9981751-1.072553 |

*Note.* OR = odds ratio; ICU = intensive care unit; Hb = hemoglobin. Variables were analyzed using a multivariable logistic regression model assessing predictors of 30-day hospital readmission.

**Supplementary Table 4**

Multivariable logistic regression model evaluating clinical factors associated with prolonged duration of hospital stay following hip fracture repair.

| **Supplementary table 4**: Multivariable model for duration of hospital stay | | | |
| --- | --- | --- | --- |
| **Variable** | **Odds Ratio** | **p-value** | **[95% Conf. Interval]** |
| Postoperative blood transfusion | 1.578994 | 0.301 | 0.6648572-3.750014 |
| Clopidogrel | 1 |  |  |
| Preoperative Hb | 1.038997 | 0.725 | 0.8398683-1.285337 |
| Spinal vs general anesthesia | 0.5715021 | 0.15 | 0.2669939-1.223304 |
| Stable femoral neck fracture | 1 |  |  |
| Postoperative ICU admission | 1.350227 | 0.618 | 0.4142734-4.400745 |
| Length of hospital stay | 1.047201 | 0.114 | 0.9889571-1.108875 |

*Note.* OR = odds ratio; ICU = intensive care unit; Hb = hemoglobin. Variables were analyzed using a multivariable logistic regression model to evaluate predictors of prolonged hospital stay.

**Supplementary Table 5**

Cox proportional hazards regression model analyzing independent predictors of overall mortality in patients undergoing hip fracture repair.

| **Supplementary table 5**: Logistic Cox regression model - multivariate for overall mortality | | | |
| --- | --- | --- | --- |
| **Variable** | **Haz. Ratio** | **p-value** | **[95% Conf. Interval]** |
| Postoperative blood transfusion | 1.147811 | 0.465 | 0.7931337-1.661093 |
| Clopidogrel | 0.9491367 | 0.856 | 0.5403152-1.667287 |
| Preoperative Hb | 0.9265772 | 0.11 | 0.8437764-1.017503 |
| Spinal vs general anesthesia | 1.179708 | 0.352 | 0.8327239-1.671274 |
| Stable femoral neck fracture | 1.205255 | 0.633 | 0.5601585-2.593266 |
| Postoperative ICU admission | 2.560855 | <0.001 | 1.673243-3.919321 |
| Length of hospital stay | 1.058746 | <0.001 | 1.037528-1.080397 |

*Note.* HR = hazard ratio; ICU = intensive care unit; Hb = hemoglobin. Variables were analyzed using a multivariable Cox proportional hazards regression model to assess predictors of overall mortality.
